# Supplementary material for: Carrageenans and Their Oligosaccharides from Red Seaweeds Ahnfeltiopsis flabelliformis and Mastocarpus pacificus (Phyllophoraceae) and Their Antiproliferative Activity
Source: MDPI journal article supplement (doi:10.3390/ijms24087657), 2023-04-21
Supplement: s1 [file s1]

## Supplementary Materials

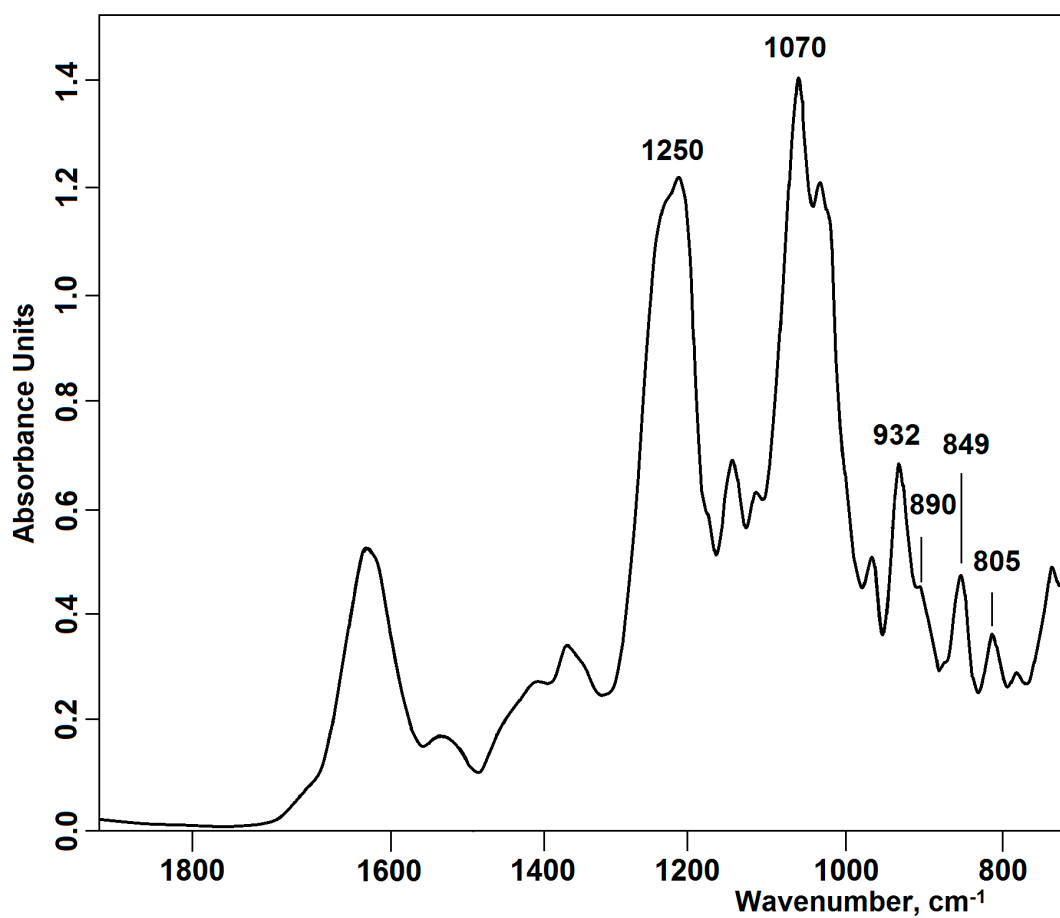

Figure S1. IR-spectrum of Afg

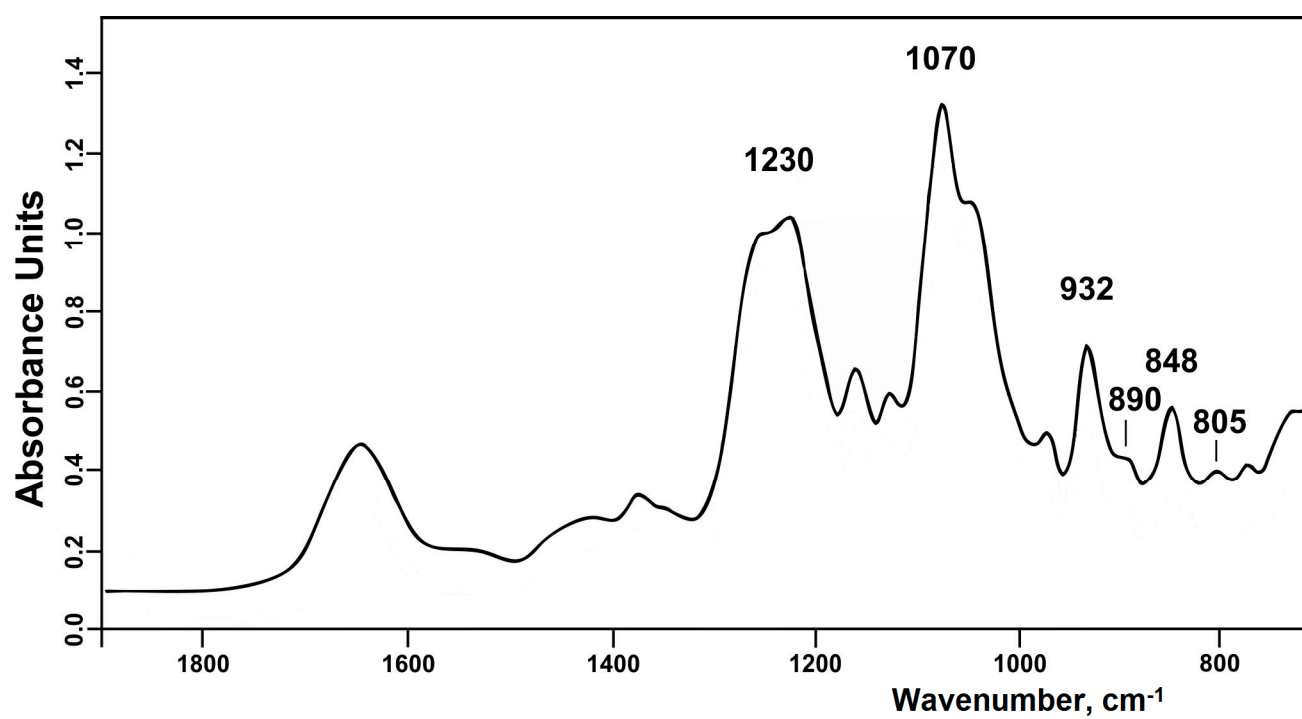

Figure S2. IR-spectrum of Mp

**Table S1.** <sup>1</sup>H and <sup>13</sup>C NMR signals (ppm) of Afg-OS and Mp-OS

| Sample | Carrageenan type | MS residue | <sup>13</sup> C/ <sup>1</sup> H chemical shifts (ppm) |           |           |           |           |                |
|--------|------------------|------------|-------------------------------------------------------|-----------|-----------|-----------|-----------|----------------|
|        |                  |            | C-1/H-1                                               | C-2/H-2   | C-3/H-3   | C-4/H-4   | C-5/H-5   | C-6/H-6        |
| Afg-OS | kappa            | A          | 102.7/4.61                                            | 69.7/3.61 | 77.4/4.00 | 74.4/4.84 | 75.6/3.79 | 62.0/3.80-3.70 |
|        |                  | B          | 95.6/5.09                                             | 70.4/4.11 | 79.8/4.50 | 78.9/4.57 | 77.6/4.66 | 70.5/4.12-4.25 |
|        | iota             | C          | 102.5/4.64                                            | 69.7/3.61 | 77.4/4.03 | 72.7/4.89 | 75.6/3.79 | 62.0/3.80-3.70 |
|        |                  | D          | 92.7/5.29                                             | 75.7/4.66 | 78.4/4.83 | 78.9/4.67 | 77.3/4.62 | 70.5/4.12-4.25 |
| Mp-OS  | kappa            | A          | 103.4/4.61                                            | 70.4/3.59 | 77.4/4.00 | 74.6/4.84 | 76.2/3.80 | 61.8/3.80-3.70 |
|        |                  | B          | 95.6 /5.10                                            | 70.4/4.13 | 79.7/4.51 | 78.9/4.60 | 77.6/4.68 | 69.9/4.21      |
|        | iota             | C          | 103.2/4.64                                            | 70.4/3.59 | 77.4/4.03 | 72.7/4.90 | 76.2/3.80 | 61.8/3.80-3.70 |
|        |                  | D          | 92.5/5.29                                             | 75.5/4.67 | 78.5/4.84 | 79.0/4.69 | 77.2/4.63 | 70.1/4.21      |
|        | mu               | E          | 105.5/4.64                                            | 71.1/3.70 | 79.2/3.97 |           | 75.4/3.81 | 62.0/3.80-3.70 |
|        |                  | F          | 98.6/5.26                                             |           | 70.7/4.05 |           | 68.7/4.19 | 70.3/4.26      |
|        | nu               | G          | 105.5/4.64                                            | 71.1/3.70 | 79.2/3.97 |           | 75.4/3.81 | 62.0/3.80-3.70 |
|        |                  | H          | 98.9/5.50                                             | 77.0/4.92 |           | 80.9/4.29 | 68.7/4.19 | 70.3/4.26      |

**Note:** MS – monosaccharide; A – 3-linked β-D-galactose 4-sulfate, B – 4-linked 3,6-anhydro-α-D-galactose of kappa-carrageenan, C – 3-linked β-D-galactose 4-sulfate, D – 4-linked 3,6-anhydro-α-D-galactose 2-sulfate of iota-carrageenan, E – 3-linked β-D-galactose 4-sulfate, F – 4-linked α-D-galactose 6-sulfate of mu-carrageenan, G – 3-linked β-D-galactose 4-sulfate, H – 4-linked α-D-galactose 2,6-disulfate of nu-carrageenan
